# Supplementary material for: A co-simulation framework for biosensor modeling and real-time signal processing: integration of COMSOL and CODIS+
Source: PeerJ journal article supplement (doi:10.7717/peerj-cs.3372), 2025-11-18
Supplement: Dataset.xlsx [file Dataset.xlsx]

## Sheet: Sheet1
Frequency (Hz)	Raw Impedance (Ω)	Filtered Impedance (Ω)	SNR Raw (dB)	SNR Filtered (dB)	T1 (ms)	T2 (ms)	WCET (ms)	RMSE	Detection Output (0/1)	Confidence (%)
10000	1200	1100	50	72	1.5	2.2	4.5	2.1	0	98.2
10592.5	1205.48	1104.93	50.14	72.11	1.51	2.21	4.51	2.09	0	98.19
11220.2	1211.29	1110.16	50.28	72.23	1.52	2.22	4.52	2.09	0	98.18
11885	1217.44	1115.69	50.44	72.35	1.53	2.23	4.53	2.08	0	98.17
12589.2	1223.95	1121.55	50.6	72.48	1.54	2.25	4.54	2.08	0	98.15
13335.1	1230.85	1127.76	50.77	72.62	1.55	2.26	4.55	2.07	0	98.14
14125.3	1238.16	1134.34	50.95	72.76	1.56	2.28	4.56	2.06	0	98.12
14962.2	1245.9	1141.31	51.15	72.92	1.57	2.29	4.57	2.05	0	98.11
15848.8	1254.1	1148.69	51.35	73.08	1.58	2.31	4.58	2.05	0	98.09
16787.8	1262.79	1156.51	51.57	73.26	1.59	2.33	4.59	2.04	0	98.07
17782.6	1271.99	1164.79	51.8	73.44	1.61	2.34	4.61	2.03	0	98.06
18836.2	1281.73	1173.56	52.04	73.63	1.62	2.36	4.62	2.02	0	98.04
19952.3	1292.06	1182.85	52.3	73.84	1.64	2.38	4.64	2.01	0	98.02
21134.5	1302.99	1192.69	52.57	74.06	1.65	2.41	4.65	2	1	97.99
22386.8	1314.58	1203.12	52.86	74.29	1.67	2.43	4.67	1.99	1	97.97
23713.3	1326.85	1214.16	53.17	74.54	1.69	2.45	4.69	1.97	1	97.95
25118.4	1339.84	1225.86	53.5	74.8	1.71	2.48	4.71	1.96	1	97.92
26606.7	1353.61	1238.25	53.84	75.07	1.73	2.51	4.73	1.95	1	97.89
28183.2	1368.19	1251.37	54.2	75.36	1.75	2.54	4.75	1.93	1	97.86
29853.1	1383.64	1265.27	54.59	75.67	1.78	2.57	4.78	1.92	1	97.83
31622	1400	1280	55	76	1.8	2.6	4.8	1.9	1	97.8
33495.8	1405.48	1283.43	55.08	76.08	1.81	2.61	4.81	1.89	1	97.76
35480.6	1411.29	1287.05	55.17	76.17	1.81	2.62	4.82	1.89	1	97.73
37583	1417.44	1290.9	55.26	76.26	1.82	2.63	4.83	1.88	1	97.69
39809.9	1423.95	1294.97	55.36	76.36	1.82	2.65	4.84	1.88	1	97.64
42168.9	1430.85	1299.28	55.46	76.46	1.83	2.66	4.85	1.87	1	97.6
44667.6	1438.16	1303.85	55.57	76.57	1.84	2.68	4.86	1.86	1	97.55
47314.4	1445.9	1308.69	55.69	76.69	1.85	2.69	4.87	1.85	1	97.5
50118	1454.1	1313.81	55.81	76.81	1.85	2.71	4.88	1.85	1	97.45
53087.7	1462.79	1319.24	55.94	76.94	1.86	2.73	4.89	1.84	1	97.39
56233.4	1471.99	1324.99	56.08	77.08	1.87	2.74	4.91	1.83	1	97.33
59565.6	1481.73	1331.08	56.23	77.23	1.88	2.76	4.92	1.82	1	97.27
63095.1	1492.06	1337.54	56.38	77.38	1.89	2.78	4.94	1.81	1	97.2
66833.8	1502.99	1344.37	56.54	77.54	1.9	2.81	4.95	1.8	1	97.13
70794.1	1514.58	1351.61	56.72	77.72	1.91	2.83	4.97	1.79	1	97.06
74989	1526.84	1359.28	56.9	77.9	1.93	2.85	4.99	1.77	1	96.98
79432.4	1539.84	1367.4	57.1	78.1	1.94	2.88	5.01	1.76	1	96.89
84139.2	1553.61	1376.01	57.3	78.3	1.95	2.91	5.03	1.75	1	96.8
89124.9	1568.19	1385.12	57.52	78.52	1.97	2.94	5.05	1.73	1	96.71
94406	1583.64	1394.77	57.75	78.75	1.98	2.97	5.08	1.72	1	96.61
100000	1600	1405	58	79	2	3	5.1	1.7	1	96.5
105925	1604.11	1408.97	58.11	79.11	2.01	3.01	5.11	1.69	1	96.46
112202	1608.46	1413.18	58.23	79.23	2.02	3.03	5.13	1.68	1	96.42
118850	1613.08	1417.64	58.35	79.35	2.03	3.04	5.14	1.67	1	96.37
125892	1617.96	1422.36	58.48	79.48	2.04	3.06	5.16	1.66	1	96.32
133352	1623.14	1427.37	58.62	79.62	2.05	3.08	5.18	1.65	1	96.27
141254	1628.62	1432.66	58.76	79.76	2.06	3.1	5.2	1.64	1	96.21
149623	1634.42	1438.28	58.92	79.92	2.07	3.11	5.21	1.63	1	96.16
158489	1640.57	1444.22	59.08	80.08	2.08	3.14	5.24	1.62	1	96.09
167880	1647.09	1450.52	59.26	80.26	2.09	3.16	5.26	1.61	1	96.03
177828	1653.99	1457.19	59.44	80.44	2.11	3.18	5.28	1.59	1	95.96
188365	1661.3	1464.26	59.63	80.63	2.12	3.2	5.3	1.58	1	95.89
199526	1669.04	1471.74	59.84	80.84	2.14	3.23	5.33	1.56	1	95.81
211349	1677.24	1479.67	60.06	81.06	2.15	3.26	5.36	1.55	1	95.73
223872	1685.93	1488.07	60.29	81.29	2.17	3.29	5.39	1.53	1	95.64
237137	1695.13	1496.96	60.54	81.54	2.19	3.32	5.42	1.51	1	95.55
251188	1704.88	1506.39	60.8	81.8	2.21	3.35	5.45	1.49	1	95.45
266072	1715.21	1516.37	61.07	82.07	2.23	3.38	5.48	1.47	1	95.35
281838	1726.14	1526.94	61.36	82.36	2.25	3.42	5.52	1.45	1	95.24
298538	1737.73	1538.14	61.67	82.67	2.28	3.46	5.56	1.42	1	95.12
316227	1750	1550	62	83	2.3	3.5	5.6	1.4	1	95
334965	1754.11	1553.56	62.08	83.11	2.31	3.51	5.62	1.39	1	94.98
354813	1758.46	1557.34	62.17	83.23	2.32	3.53	5.63	1.38	1	94.95
375837	1763.08	1561.33	62.26	83.35	2.33	3.54	5.65	1.37	1	94.93
398106	1767.96	1565.57	62.36	83.48	2.35	3.56	5.67	1.36	1	94.9
421696	1773.14	1570.05	62.46	83.62	2.36	3.58	5.69	1.35	1	94.88
446683	1778.62	1574.8	62.57	83.76	2.38	3.6	5.71	1.34	1	94.85
473151	1784.42	1579.83	62.69	83.92	2.39	3.61	5.74	1.33	1	94.82
501187	1790.57	1585.16	62.81	84.08	2.41	3.64	5.76	1.32	1	94.78
530884	1797.09	1590.81	62.94	84.26	2.43	3.66	5.79	1.31	1	94.75
562341	1803.99	1596.79	63.08	84.44	2.44	3.68	5.82	1.29	1	94.71
595661	1811.3	1603.13	63.23	84.63	2.46	3.7	5.85	1.28	1	94.67
630957	1819.04	1609.84	63.38	84.84	2.48	3.73	5.88	1.26	1	94.63
668343	1827.24	1616.94	63.54	85.06	2.51	3.76	5.91	1.25	1	94.59
707945	1835.93	1624.47	63.72	85.29	2.53	3.79	5.94	1.23	1	94.54
749894	1845.13	1632.45	63.9	85.54	2.55	3.82	5.98	1.21	1	94.49
794328	1854.88	1640.9	64.1	85.8	2.58	3.85	6.02	1.19	1	94.44
841395	1865.21	1649.85	64.3	86.07	2.61	3.88	6.06	1.17	1	94.39
891251	1876.14	1659.32	64.52	86.36	2.64	3.92	6.1	1.15	1	94.33
944061	1887.73	1669.36	64.75	86.67	2.67	3.96	6.15	1.12	1	94.27
1000000	1900	1680	65	87	2.7	4	6.2	1.1	1	94.2
